# Supplementary material for: New Terpenes from the Egyptian Soft Coral Sarcophyton ehrenbergi
Source: Mar Drugs. 2014 Apr 2;12(4):1977–86. doi: 10.3390/md12041977 (PMC4012453; doi:10.3390/md12041977)

## Supplementary Information

**Figure S1.**  $^1\text{H}$  NMR spectrum of 7 Keto, 8 hydroxy sarcophine (**1**) in  $\text{CDCl}_3$ .

**Figure S2.**  $^{13}\text{C}$  NMR spectrum of 7 Keto, 8 hydroxy sarcophine (**1**) in  $\text{CDCl}_3$ .

**Figure S3.** HMBC spectrum of 7 Keto, 8 hydroxy sarcophine (**1**) in  $\text{CDCl}_3$ .

**Figure S4.** HMBC spectrum of 7 Keto, 8 hydroxy sarcophine (**1**) in  $\text{CDCl}_3$ .

**Figure S5.**  $^1\text{H}$  NMR spectrum of 7 $\beta$ -Chloro-8 $\alpha$ -hydroxy-12-acetoxy-deepoxysarcophine (**2**) in  $\text{CDCl}_3$ .

**Figure S6.**  $^{13}\text{C}$  NMR spectrum of 7 $\beta$ -Chloro-8 $\alpha$ -hydroxy-12-acetoxy-deepoxysarcophine (**2**) in  $\text{CDCl}_3$ .

**Figure S7.** HMQC spectrum of 7 $\beta$ -Chloro-8 $\alpha$ -hydroxy-12-acetoxy-deepoxysarcophine (**2**) in  $\text{CDCl}_3$ .

**Figure S8.** HMBC spectrum of 7 $\beta$ -Chloro-8 $\alpha$ -hydroxy-12-acetoxy-deepoxysarcophine (**2**) in  $\text{CDCl}_3$ .

**Figure S9.**  $^1\text{H}$  NMR spectrum of (*E*)-Methyl-3-(5-butyl-1-hydroxy-2,3-dimethyl-4-oxocyclopent-2-enyl)acrylate (**3**) in  $\text{CDCl}_3$ .

**Figure S10.**  $^{13}\text{C}$  NMR spectrum of (*E*)-Methyl-3-(5-butyl-1-hydroxy-2,3-dimethyl-4-oxocyclopent-2-enyl)acrylate (**3**) in  $\text{CDCl}_3$ .

**Figure S11.** HMQC spectrum of (*E*)-Methyl-3-(5-butyl-1-hydroxy-2,3-dimethyl-4-oxocyclopent-2-enyl)acrylate (**3**) in  $\text{CDCl}_3$ .

**Figure S12.** HMBC spectrum of (*E*)-Methyl-3-(5-butyl-1-hydroxy-2,3-dimethyl-4-oxocyclopent-2-enyl)acrylate (**3**) in  $\text{CDCl}_3$ .

**Figure S1.**  $^1\text{H}$  NMR spectrum of 7 Keto, 8 hydroxy sarcophine (**1**) in  $\text{CDCl}_3$ .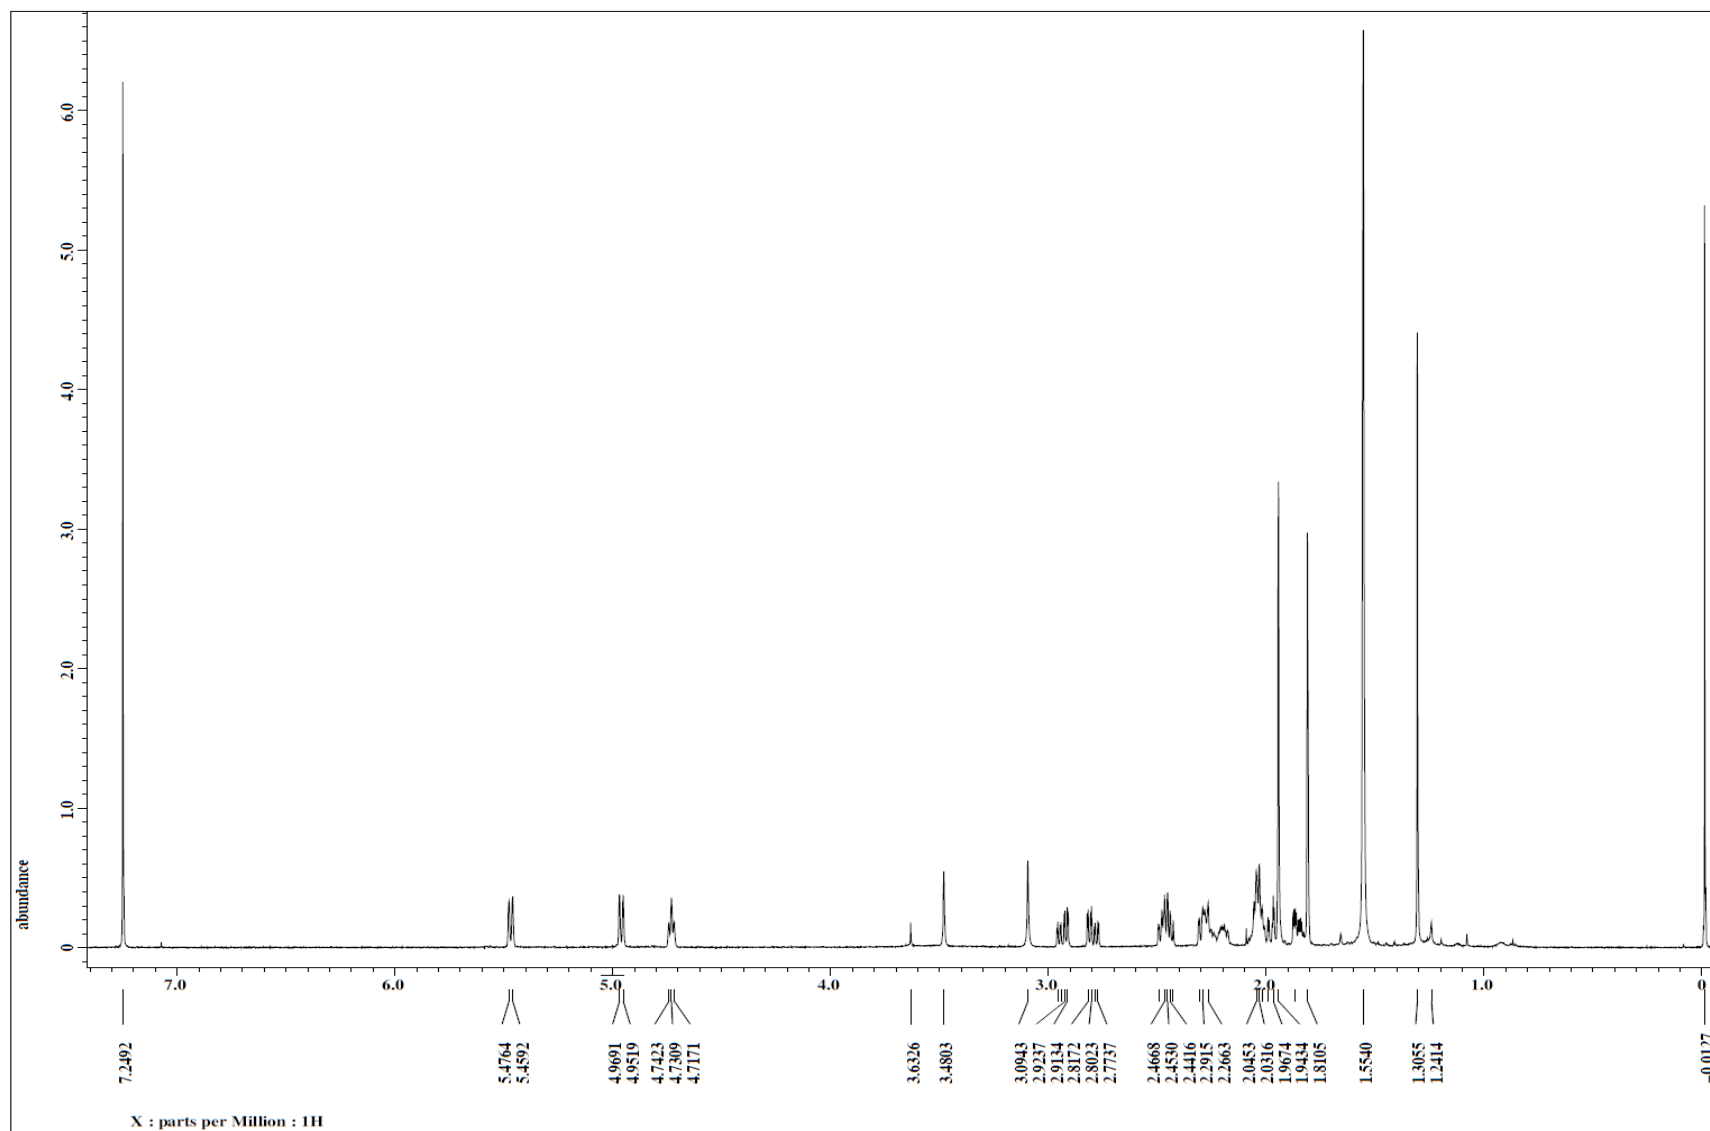

**Figure S2.**  $^{13}\text{C}$  NMR spectrum of 7 Keto, 8 hydroxy sarcophine (**1**) in  $\text{CDCl}_3$ .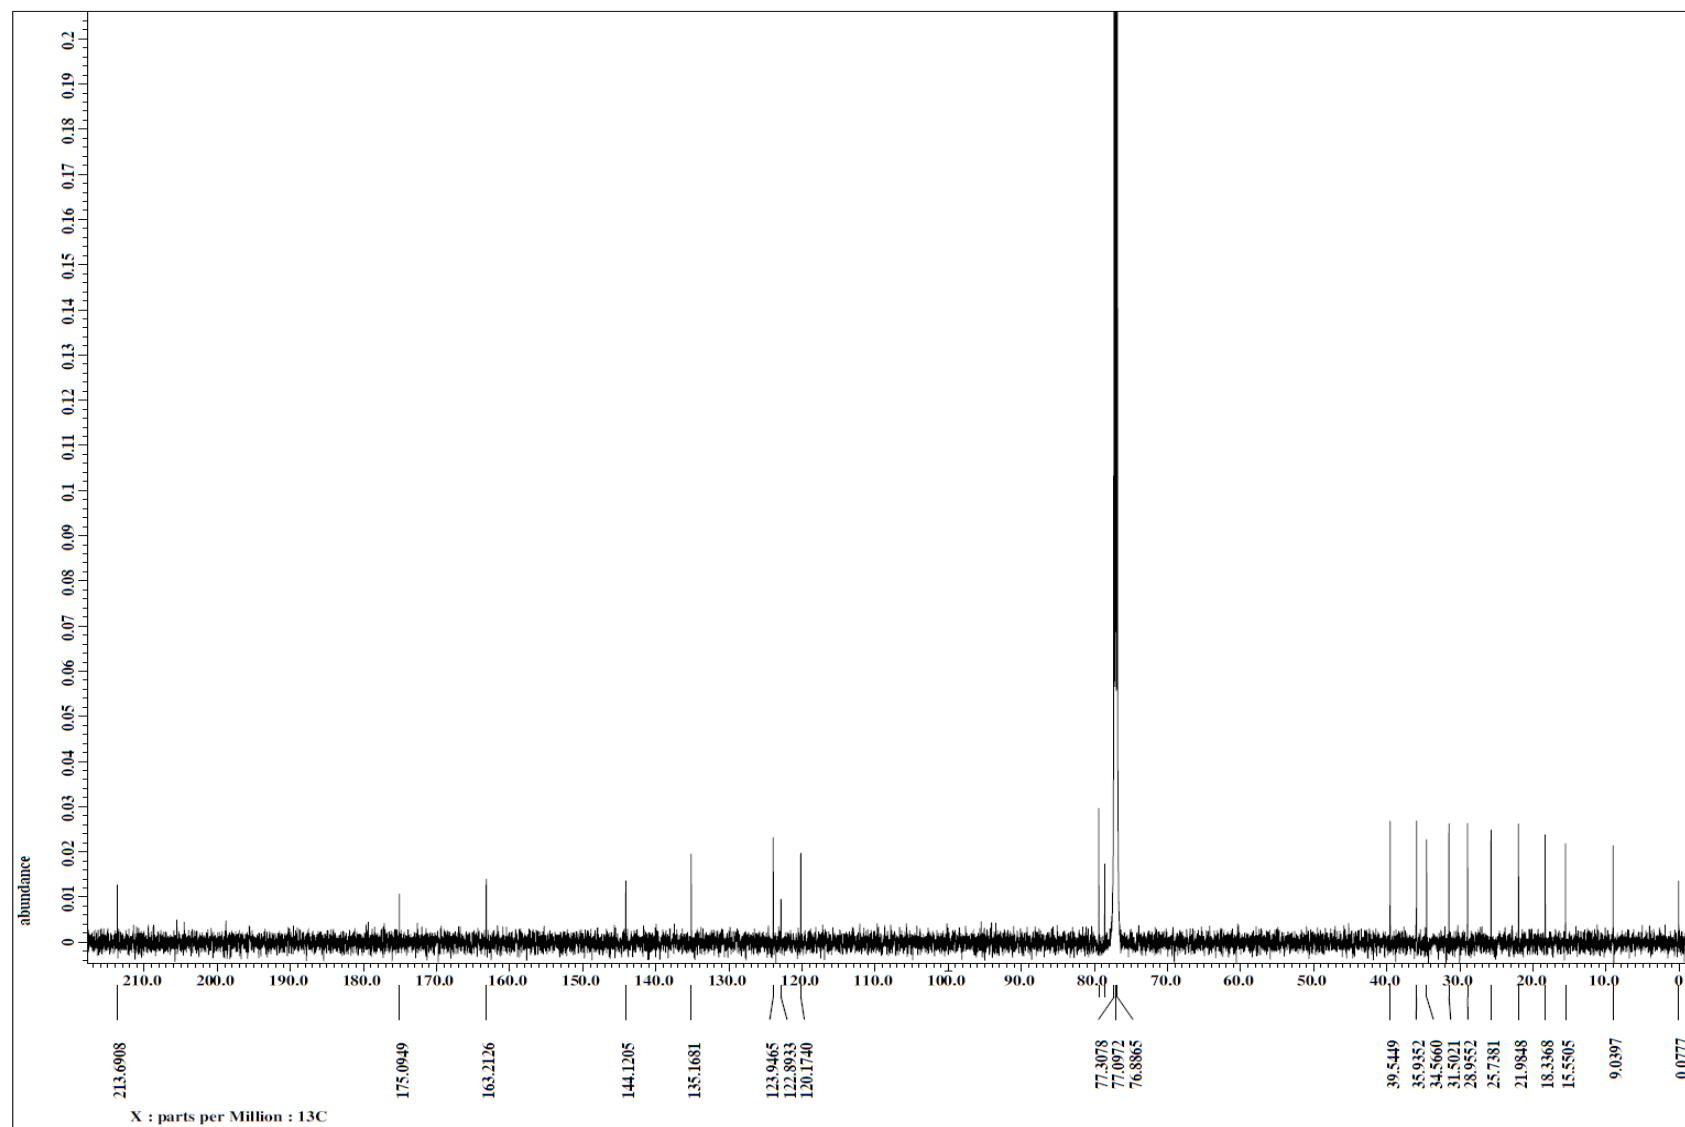

**Figure S3.** HMQC spectrum of 7 Keto, 8 hydroxy sarcophine (**1**) in  $\text{CDCl}_3$ .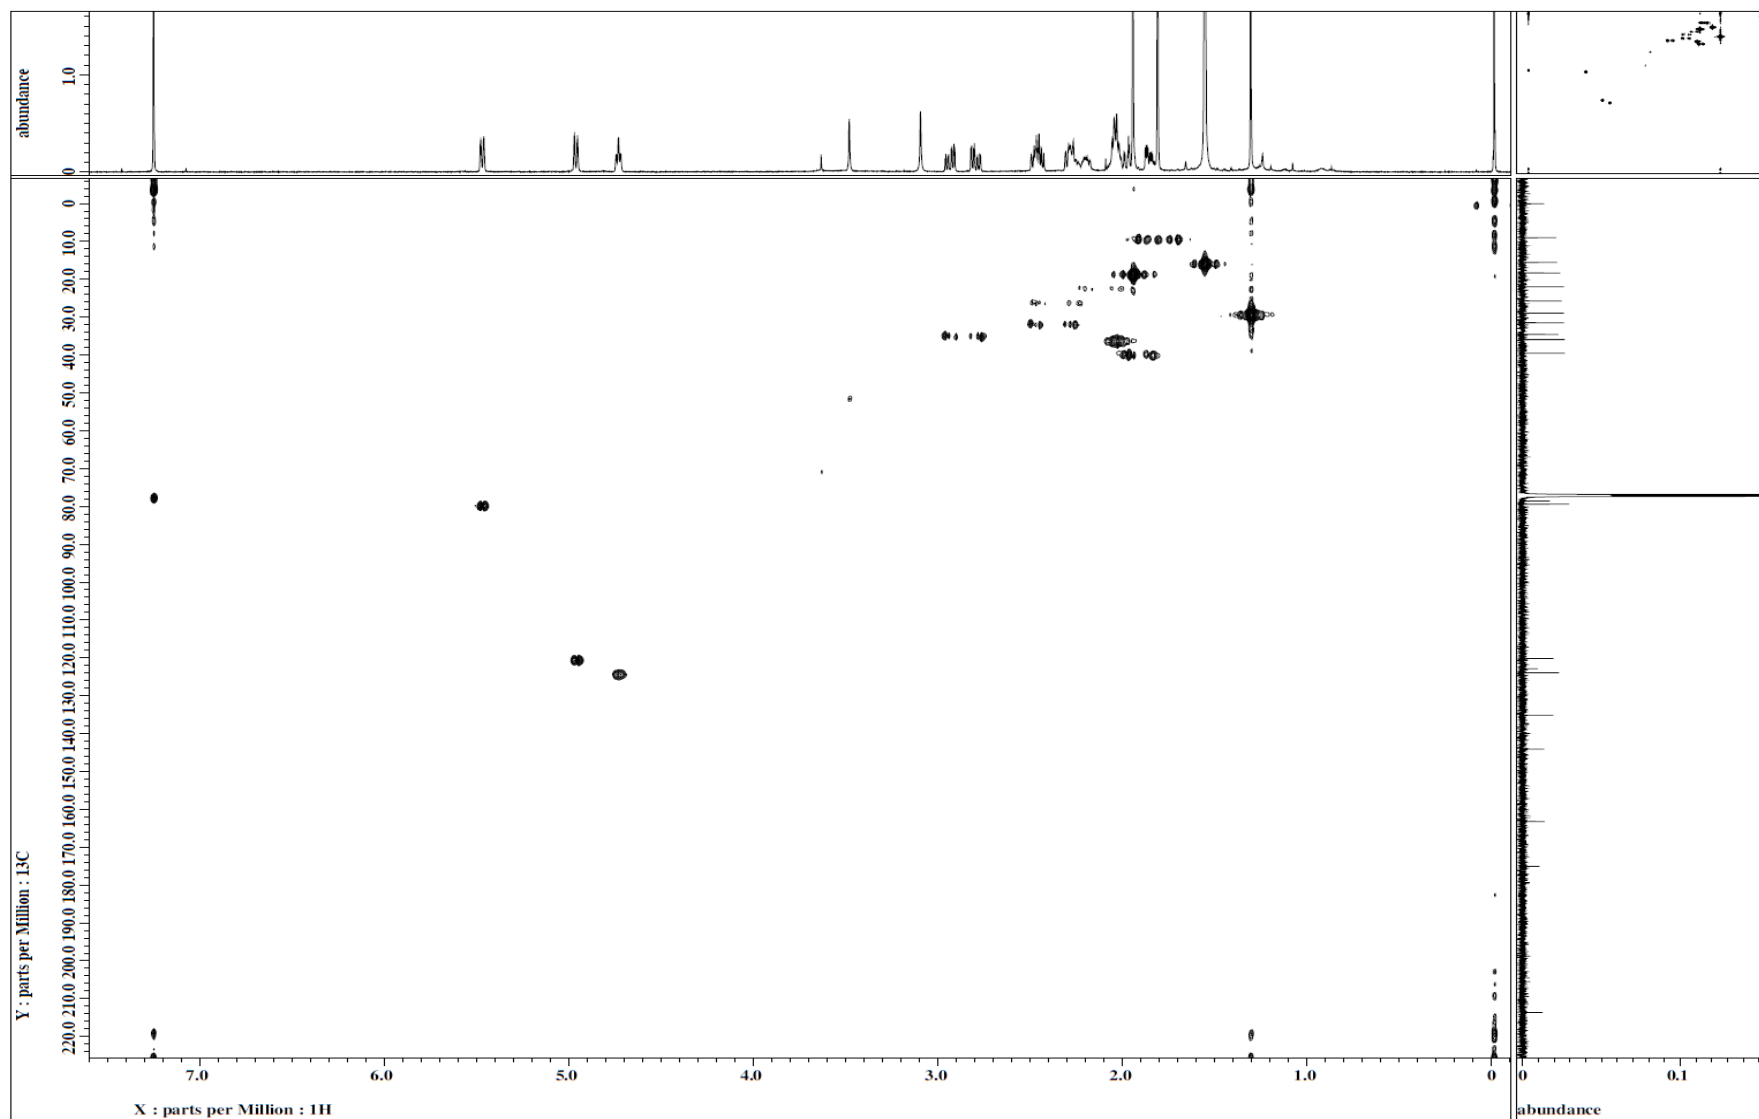

**Figure S4.** HMBC spectrum of 7 Keto, 8 hydroxy sarcophine (**1**) in CDCl<sub>3</sub>.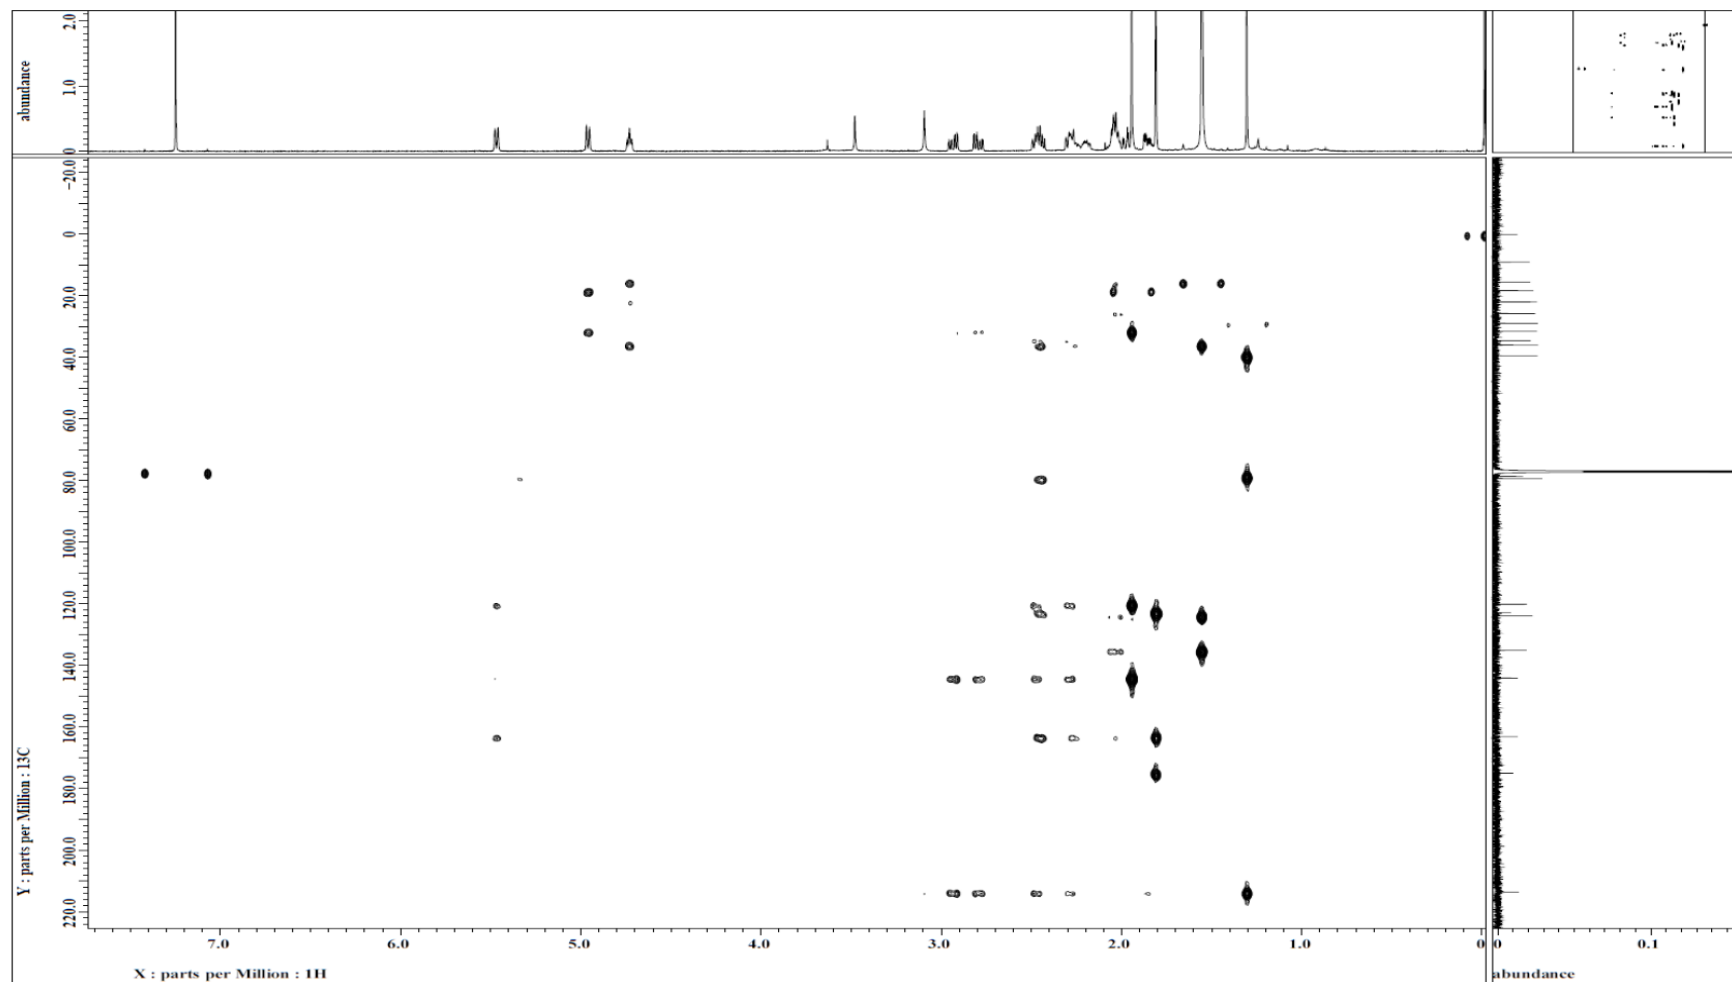

**Figure S5.**  $^1\text{H}$  NMR spectrum of 7 $\beta$ -Chloro-8 $\alpha$ -hydroxy-12-acetoxy-deepoxysarcophine (**2**) in  $\text{CDCl}_3$ .

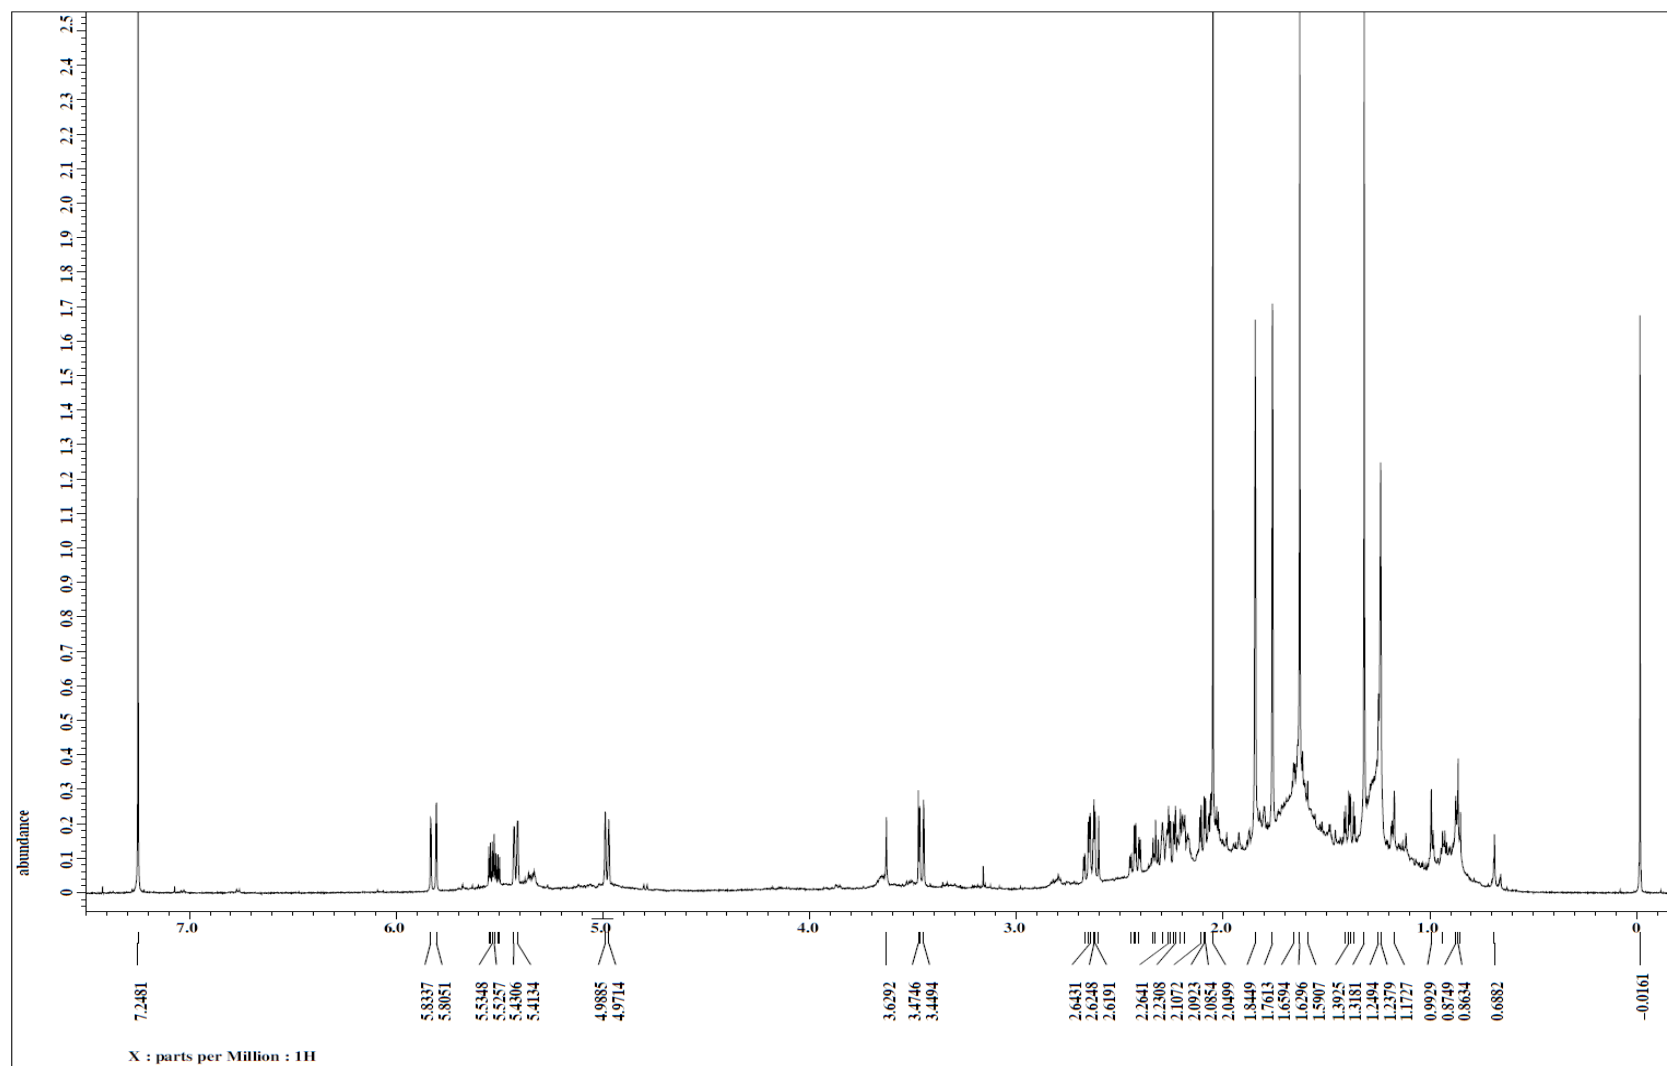

**Figure S6.**  $^{13}\text{C}$  NMR spectrum of 7 $\beta$ -Chloro-8 $\alpha$ -hydroxy-12-acetoxy-deepoxysarcophine (**2**) in  $\text{CDCl}_3$ .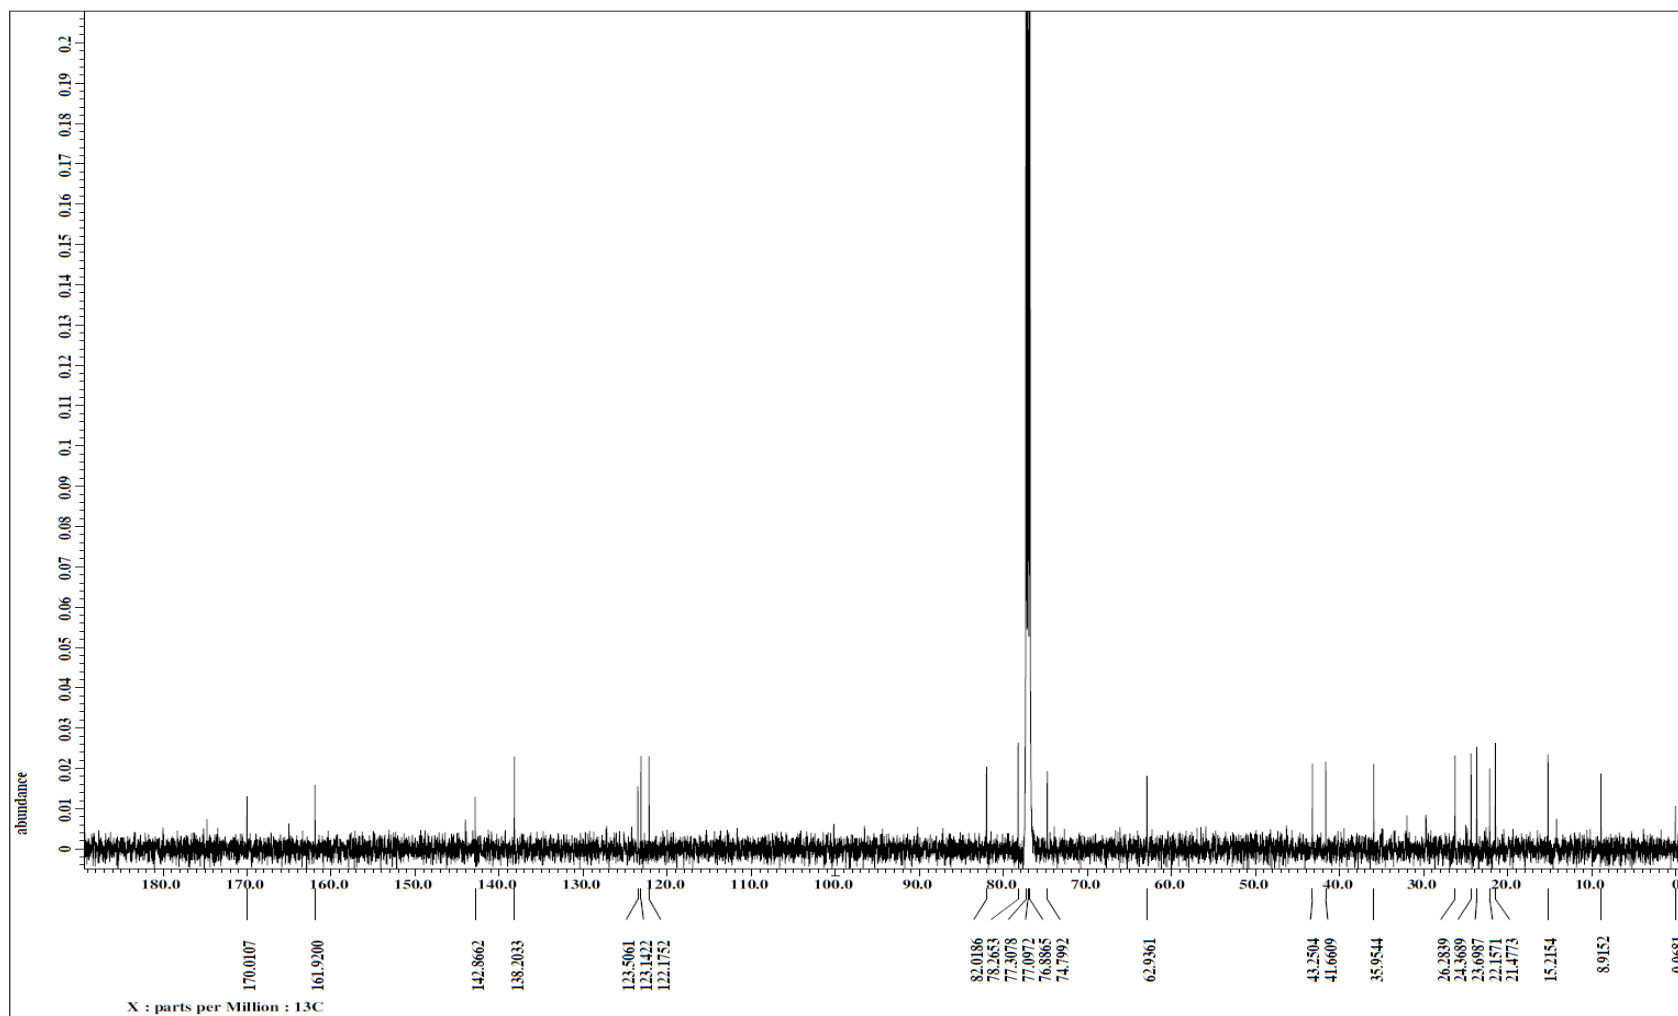

**Figure S7.** HMQC spectrum of 7 $\beta$ -Chloro-8 $\alpha$ -hydroxy-12-acetoxy-deepoxysarcophine (**2**) in CDCl<sub>3</sub>.

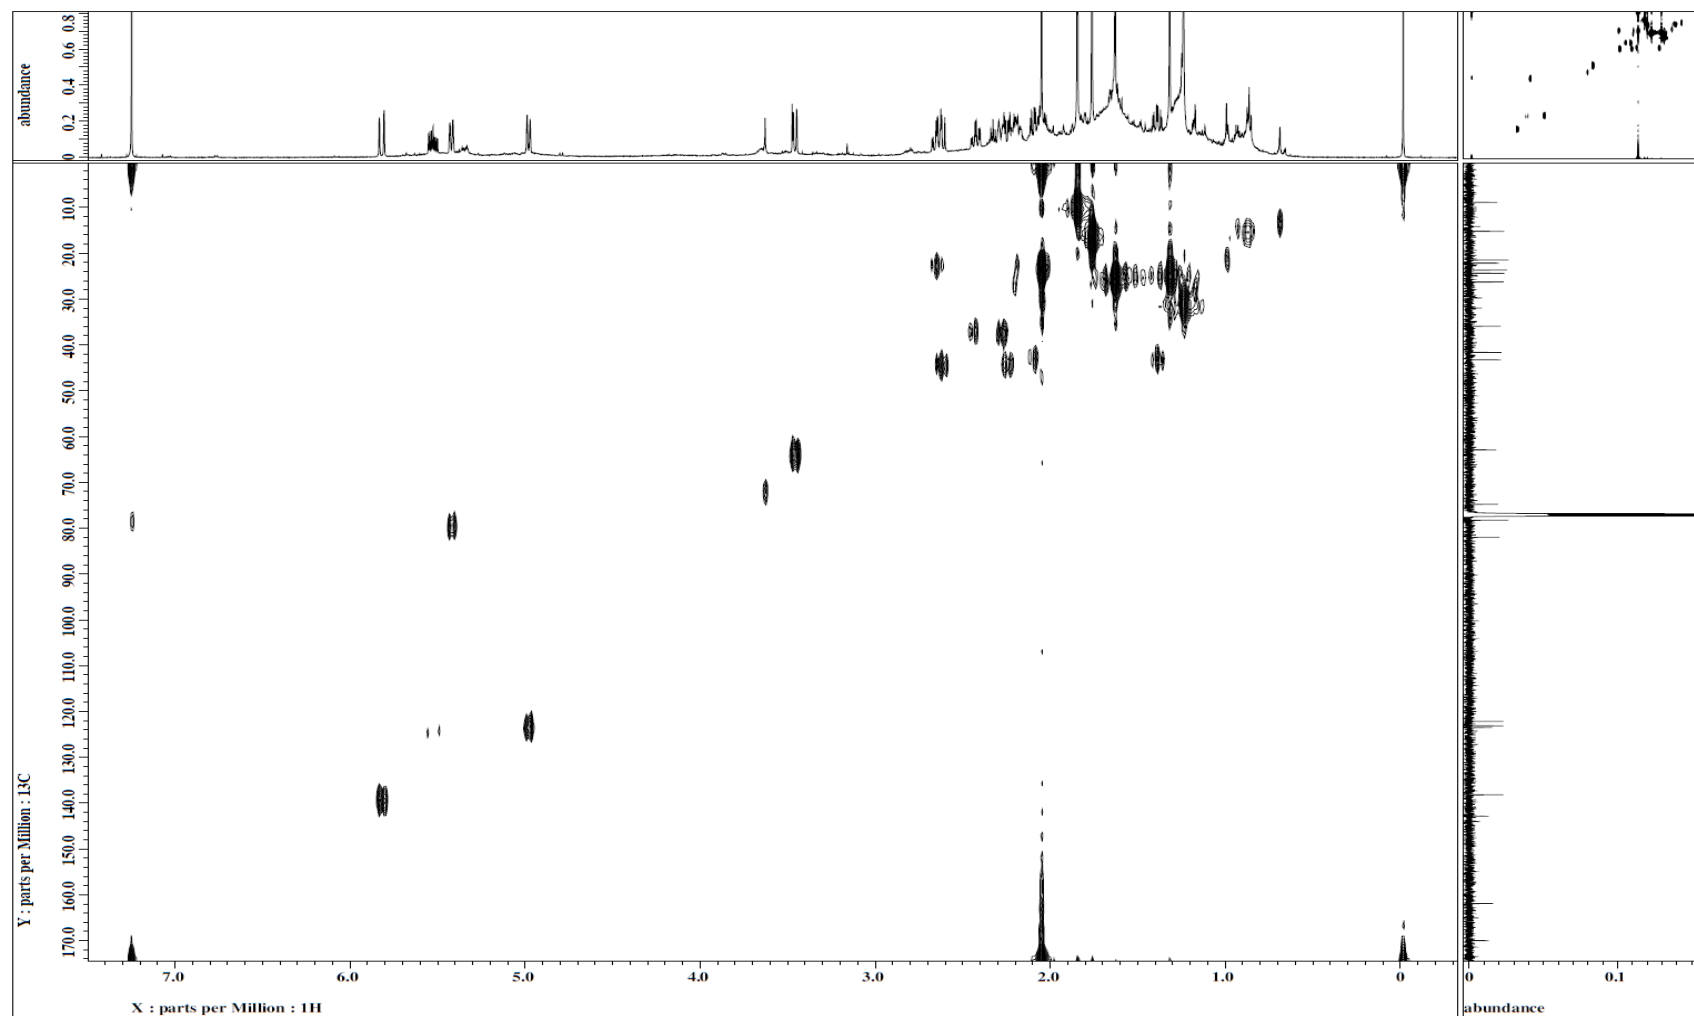

**Figure S8.** HMBC spectrum of 7 $\beta$ -Chloro-8 $\alpha$ -hydroxy-12-acetoxy-deepoxysarcophine (**2**) in CDCl<sub>3</sub>.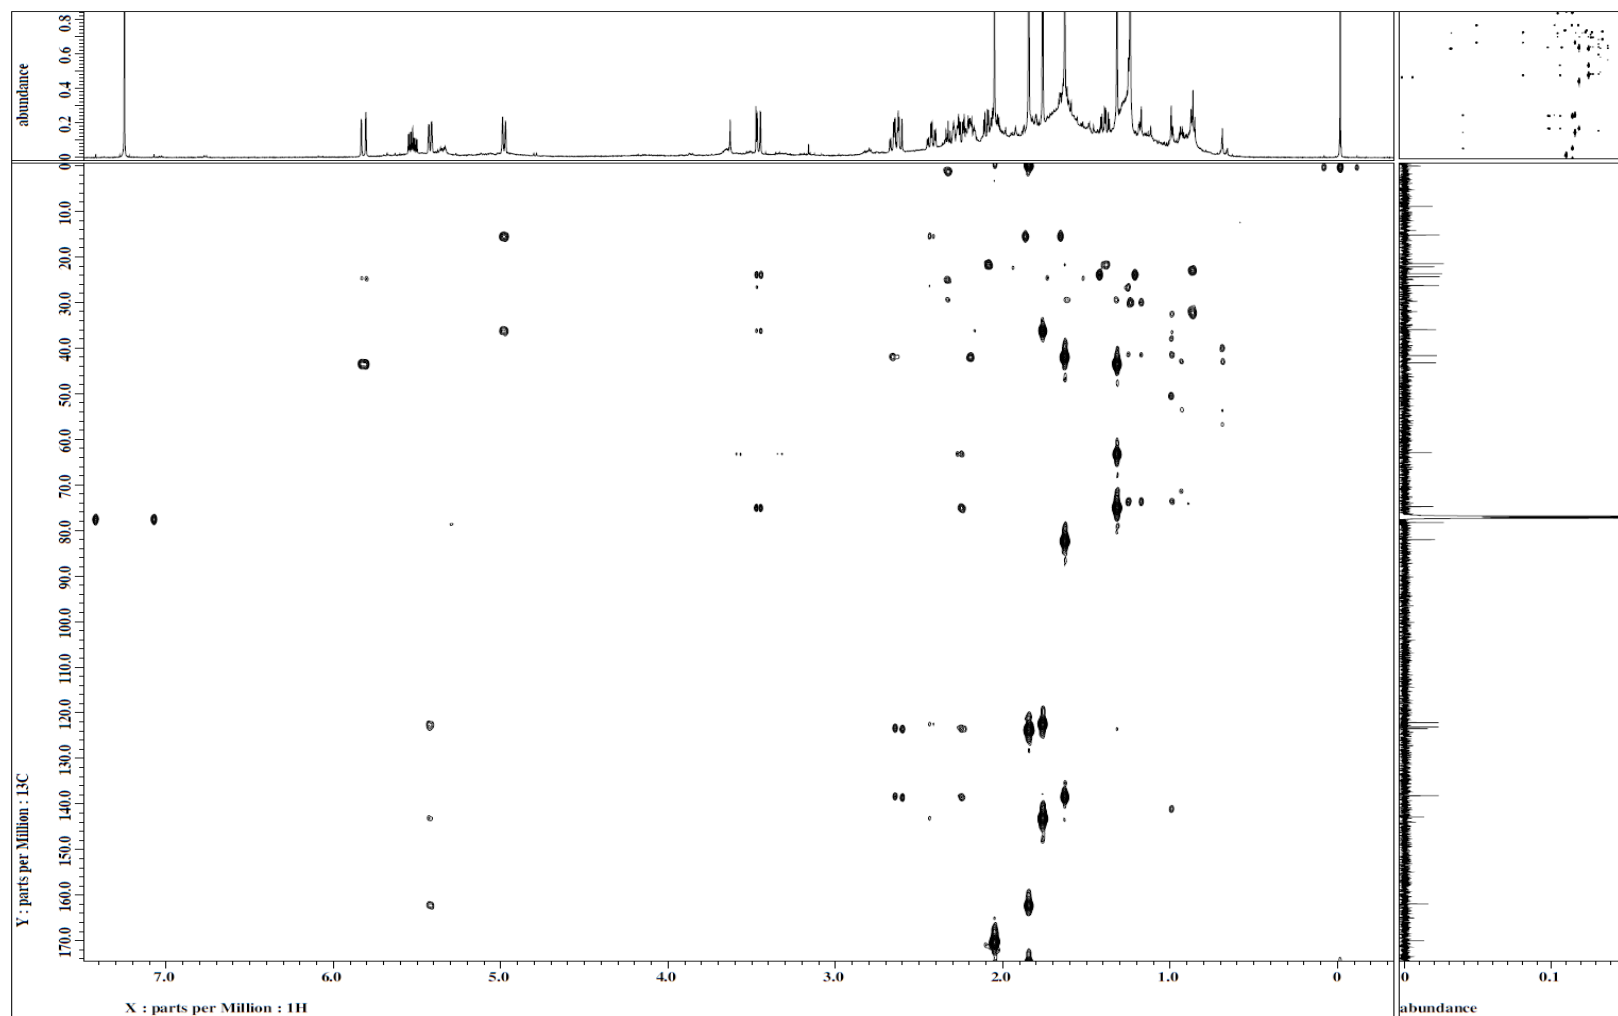

**Figure S9.**  $^1\text{H}$  NMR spectrum of (*E*)-Methyl-3-(5-butyl-1-hydroxy-2,3-dimethyl-4-oxocyclopent-2-enyl)acrylate (**3**) in  $\text{CDCl}_3$ .

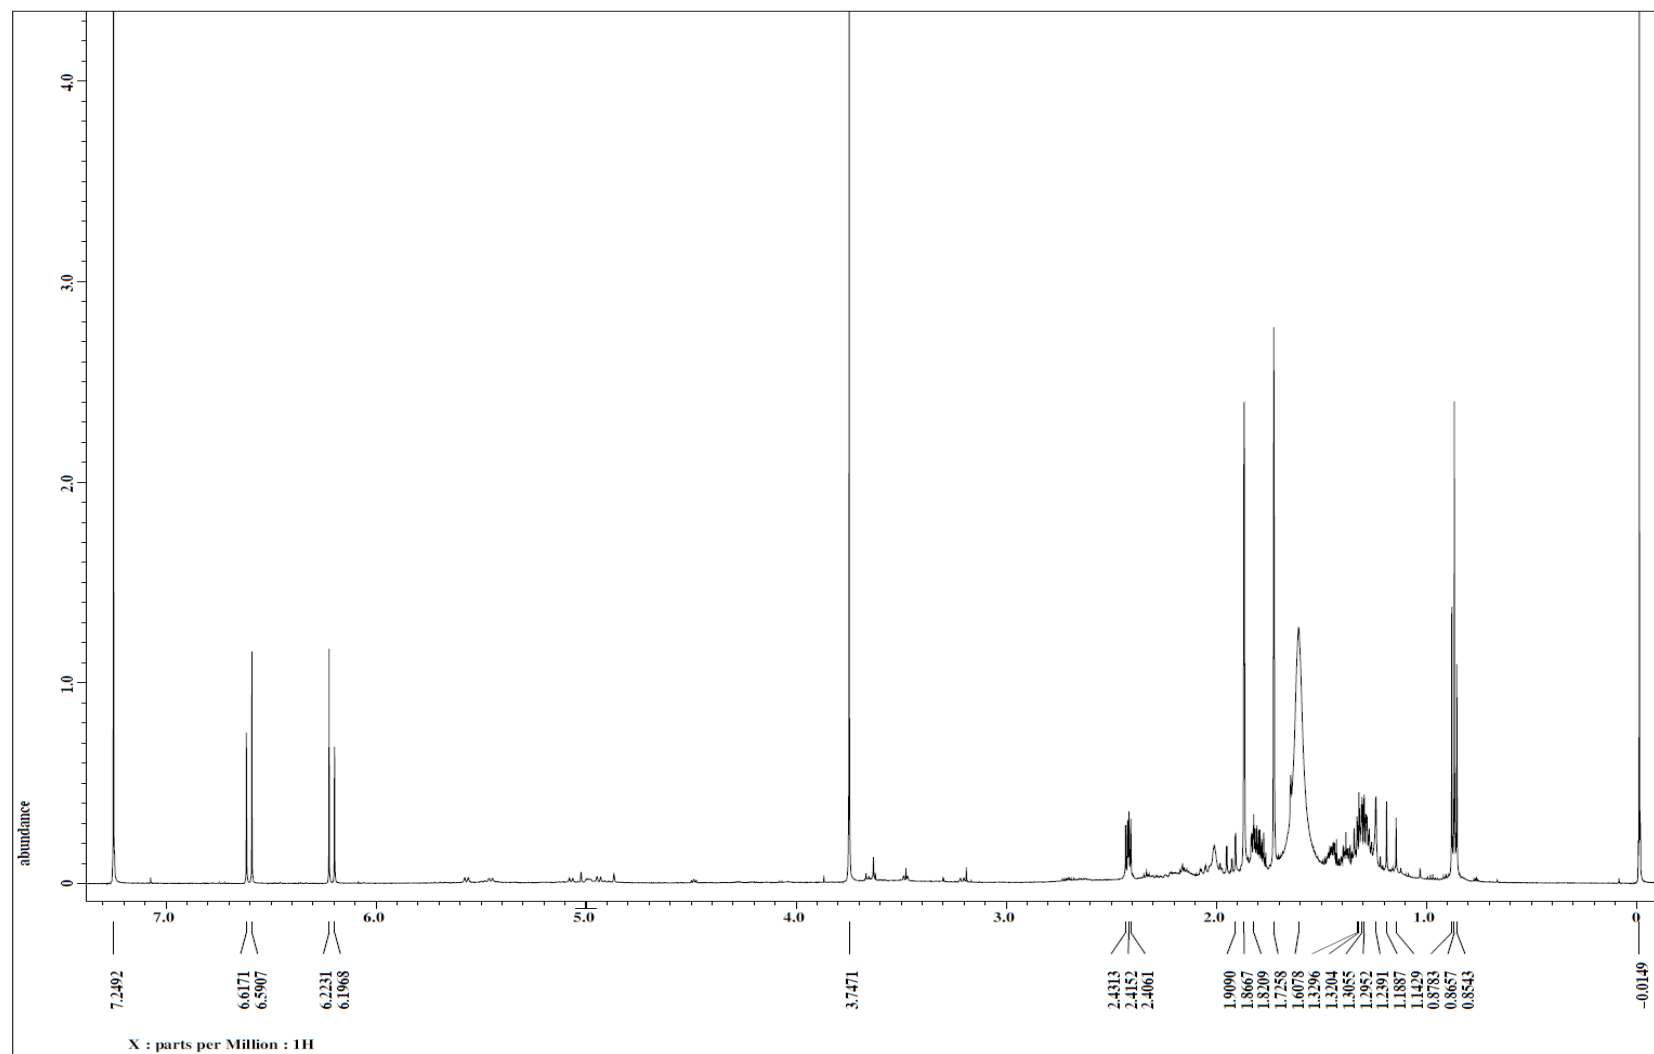

**Figure S10.**  $^{13}\text{C}$  NMR spectrum of (*E*)-Methyl-3-(5-butyl-1-hydroxy-2,3-dimethyl-4-oxocyclopent-2-enyl)acrylate (**3**) in  $\text{CDCl}_3$ .

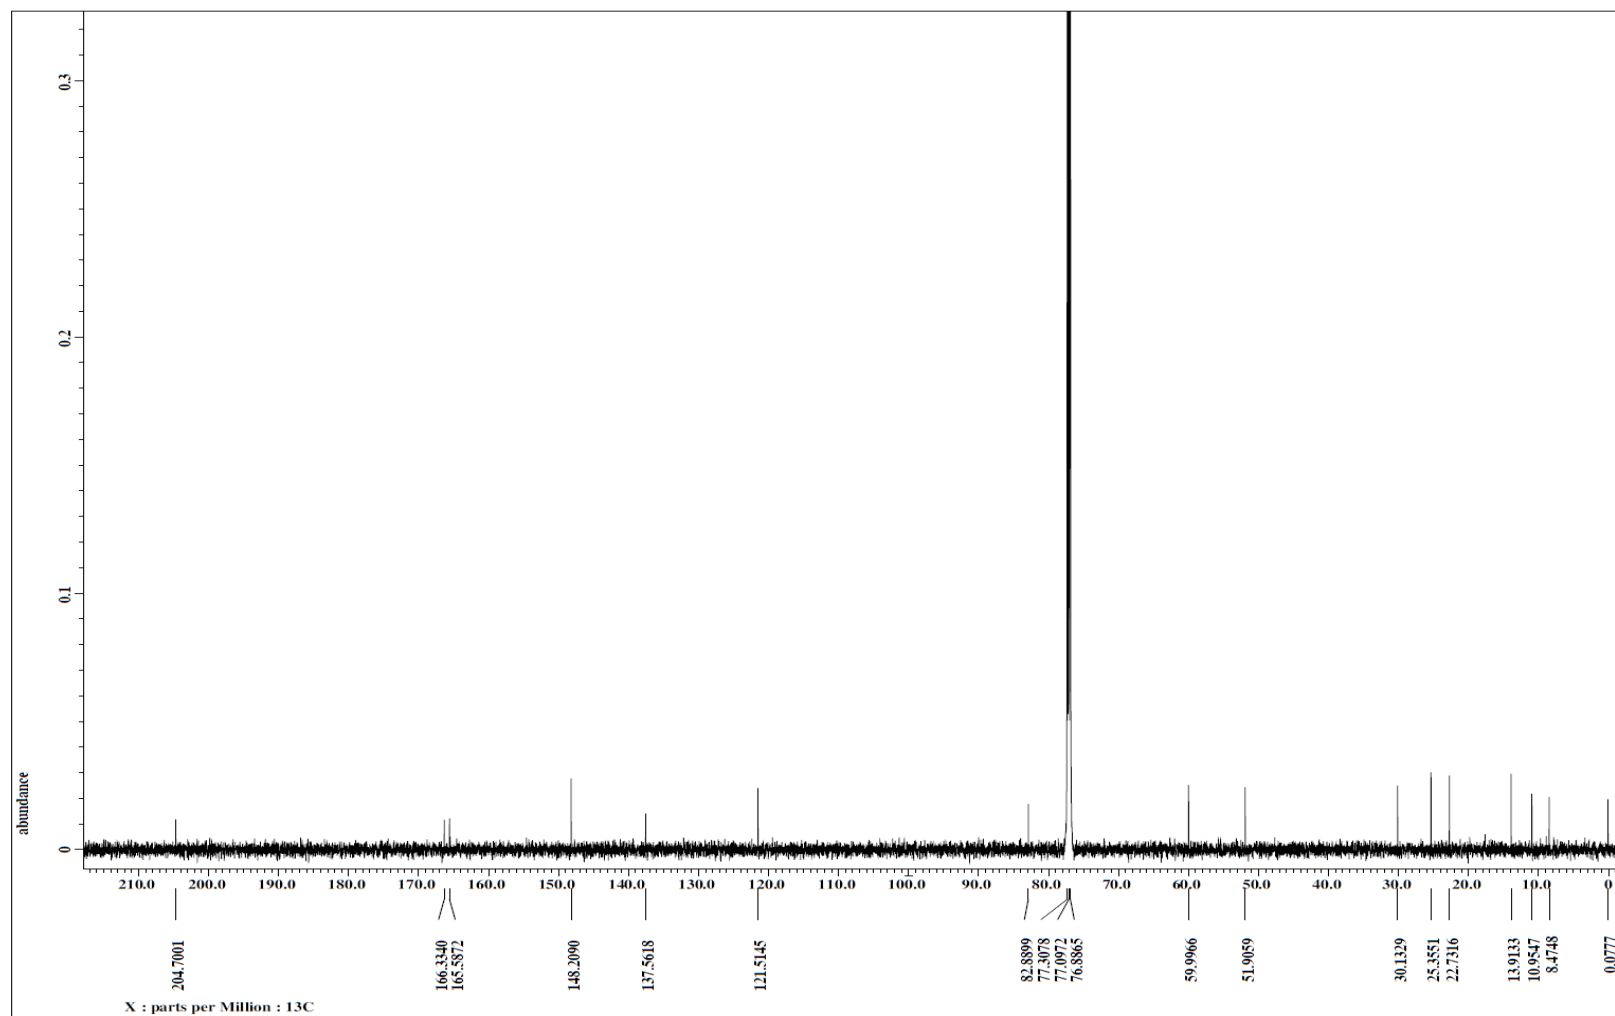

**Figure S11.** HMQC spectrum of (*E*)-Methyl-3-(5-butyl-1-hydroxy-2,3-dimethyl-4-oxocyclopent-2-enyl)acrylate (**3**) in CDCl<sub>3</sub>.

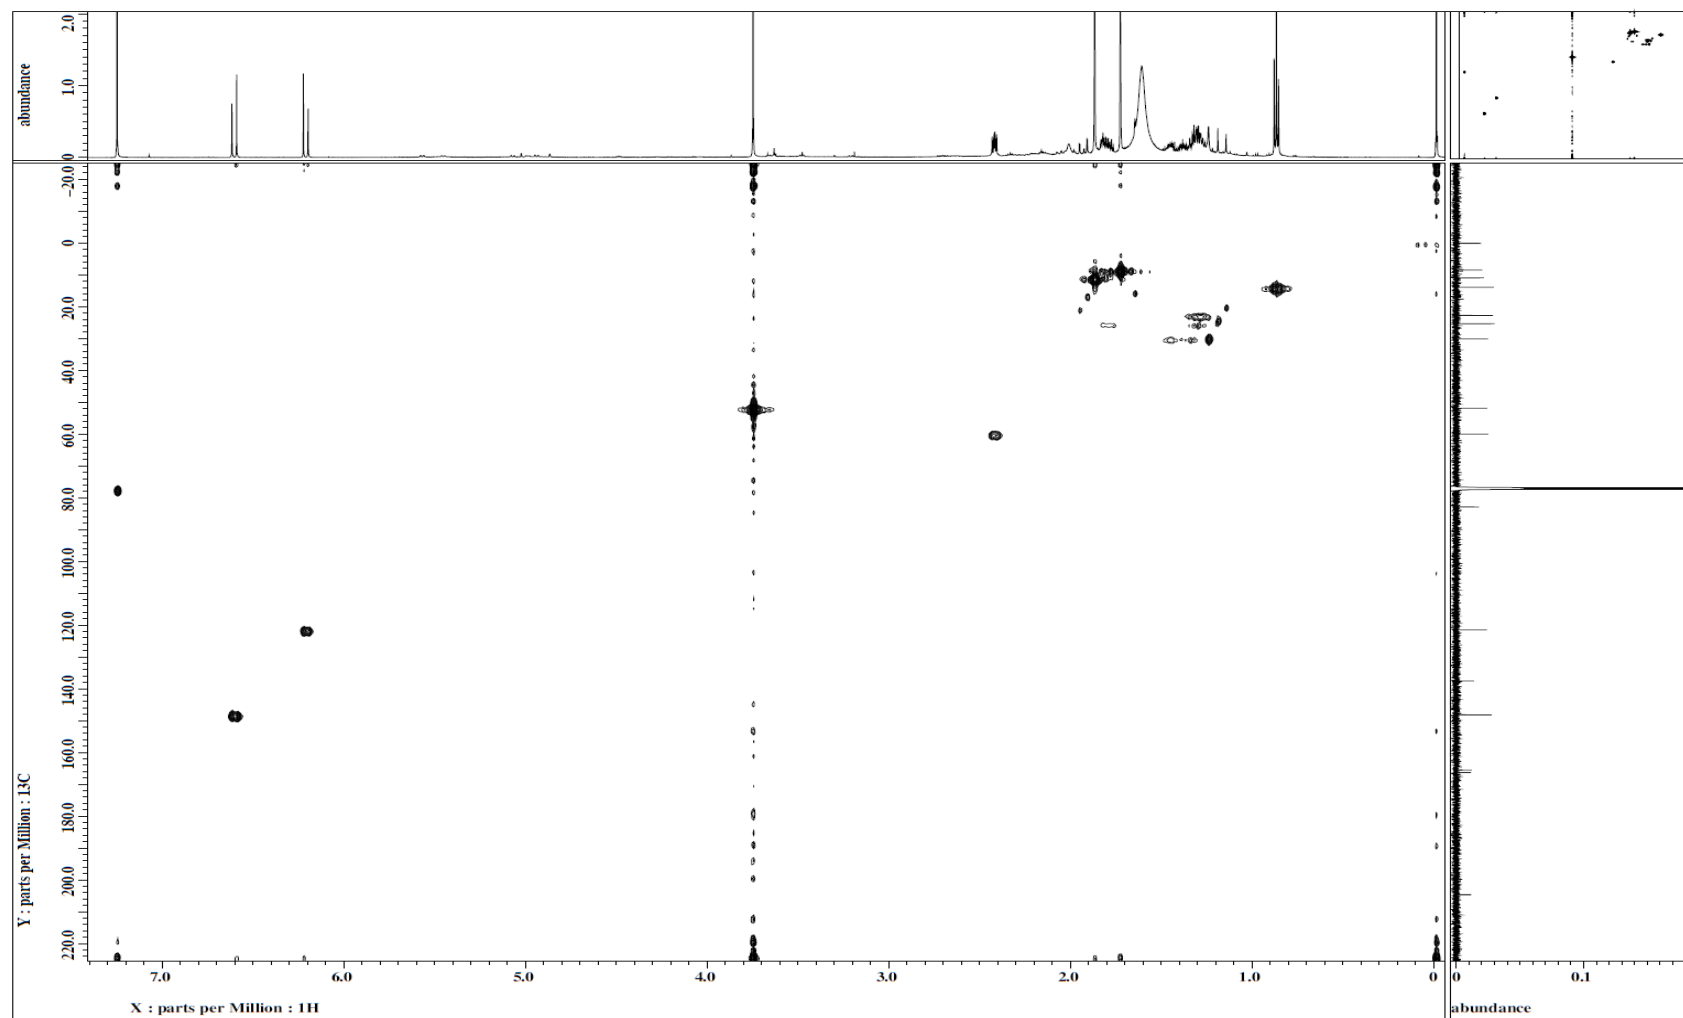

**Figure S12.** HMBC spectrum of (*E*)-Methyl-3-(5-butyl-1-hydroxy-2,3-dimethyl-4-oxocyclopent-2-enyl)acrylate (**3**) in CDCl<sub>3</sub>.

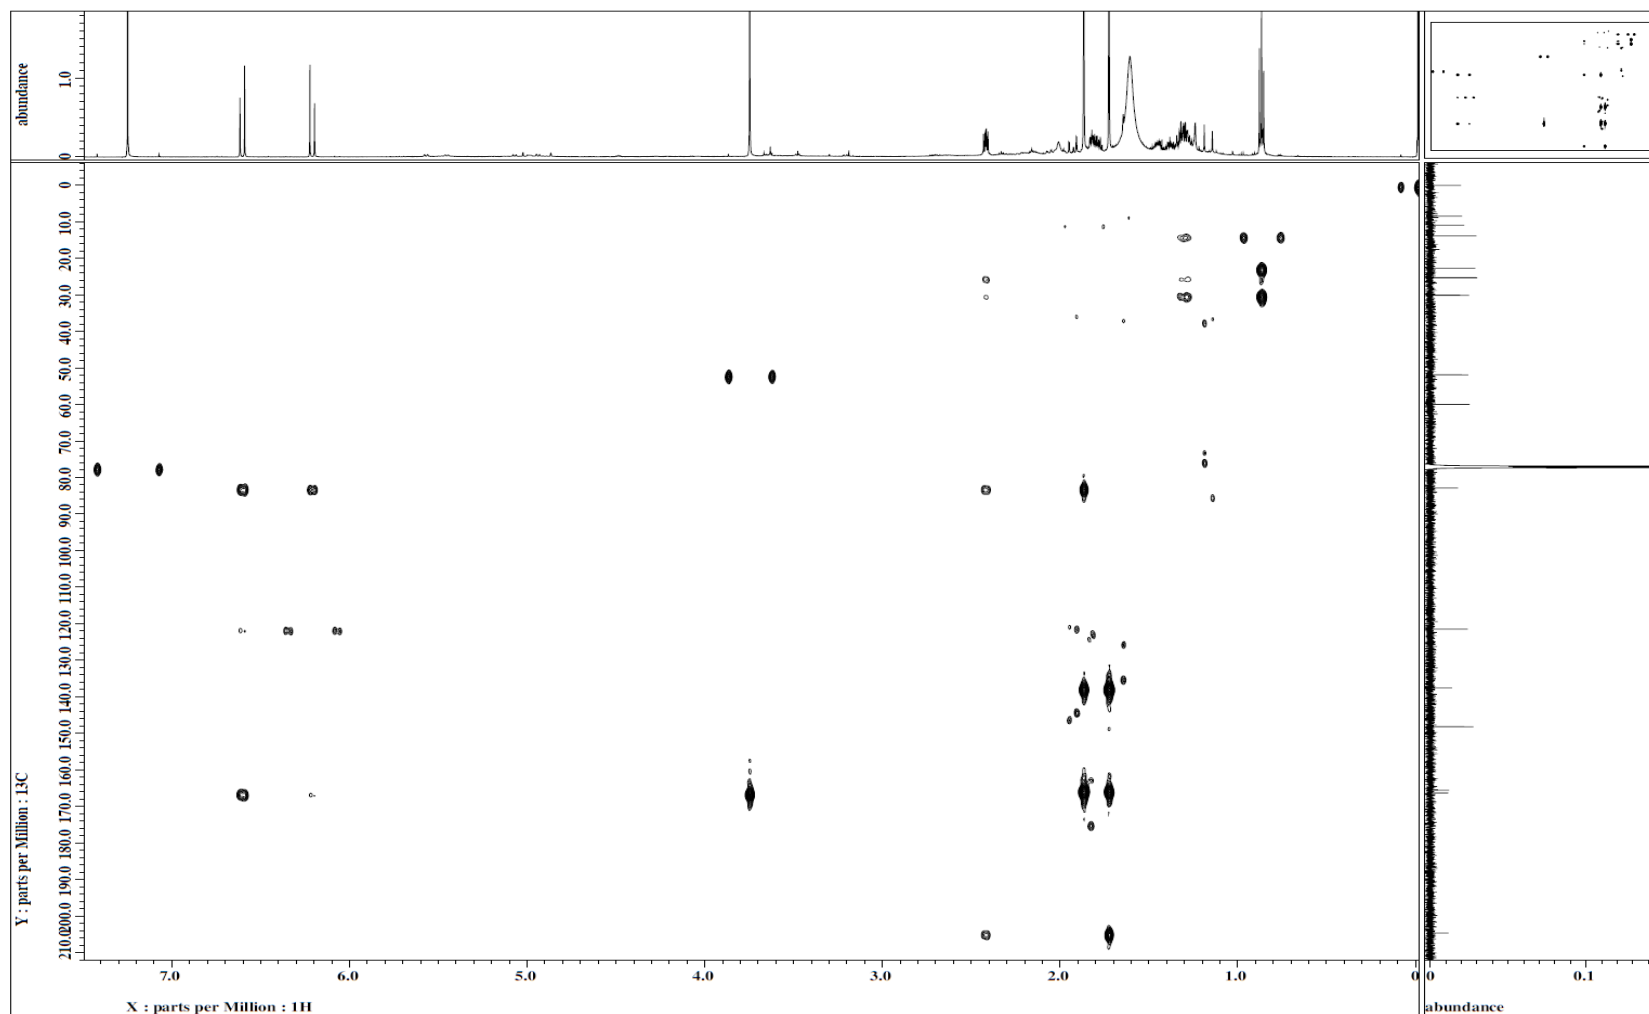

Supplement: Supplementary File 1 — Supplementary Information (PDF, 1002 KB) [file marinedrugs-12-01977-s001.pdf]
